# Supplementary material for: Mucosal Metabolomic Profiling and Pathway Analysis Reveal the Metabolic Signature of Ulcerative Colitis
Source: MDPI journal article supplement (doi:10.3390/metabo9120291), 2019-11-27
Supplement: s1 [file s1]

Kruskal Wallis analysis comparing the mucosal metabolomic profile among the study groups

| Metabolites                                          | Kruskal Wallis Test adj. p-value* | Active UC vs Healthy Control |                  | Active UC vs Remission UC |              | Remission UC vs Healthy Control |              |
|------------------------------------------------------|-----------------------------------|------------------------------|------------------|---------------------------|--------------|---------------------------------|--------------|
|                                                      |                                   | Fold change                  | P.value**        | Fold change               | P.value**    | Fold change                     | P.value**    |
| 2-Hydroxyhexanoate                                   | 1.000                             | 0.90                         | 0.804            | 0.82                      | 0.218        | 0.91                            | 0.166        |
| 2-Hydroxyoctanoate                                   | 0.297                             | 0.75                         | 0.259            | 1.18                      | 0.217        | 1.58                            | 0.032        |
| 2-Hydroxypalmitate                                   | 0.503                             | 0.92                         | 0.360            | 1.11                      | 0.247        | 1.20                            | 0.059        |
| 2-Hydroxystearate                                    | <b>0.028</b>                      | 1.15                         | <b>0.003</b>     | 1.31                      | 0.622        | 1.14                            | 0.037        |
| 2'-O-methylguanosine                                 | 0.153                             | 1.95                         | 0.769            | 1.31                      | 0.035        | 0.67                            | 0.024        |
| 3-Carboxy-4-methyl-5-propyl-2-furanpropanoate (CMPF) | <b>0.014</b>                      | 0.31                         | 0.529            | 0.50                      | <b>0.001</b> | 1.60                            | <b>0.012</b> |
| 3-Hydroxydecanoate                                   | <b>0.021</b>                      | 0.70                         | <b>0.015</b>     | 0.43                      | <b>0.005</b> | 0.62                            | 0.562        |
| 3-Hydroxylaurate                                     | 0.221                             | 0.72                         | 0.216            | 1.29                      | 0.202        | 1.80                            | 0.023        |
| 3-Hydroxymyristate                                   | 0.775                             | 0.82                         | 0.377            | 1.15                      | 0.355        | 1.41                            | 0.100        |
| 3-Hydroxypalmitate                                   | 0.291                             | 0.87                         | 0.296            | 1.12                      | 0.186        | 1.28                            | 0.031        |
| 3-methylglutaryl carnitine                           | <b>0.003</b>                      | 0.61                         | <b>0.001</b>     | 0.59                      | <b>0.005</b> | 0.97                            | 0.818        |
| 3-isomethylglutaryl carnitine                        | <b>0.003</b>                      | 0.60                         | <b>0.001</b>     | 0.59                      | <b>0.004</b> | 0.99                            | 0.897        |
| 4-Aminobutyric Acid                                  | 1.000                             | 0.82                         | 0.305            | 1.46                      | 0.703        | 1.78                            | 0.213        |
| 5-hydroxyhexanoate                                   | 1.000                             | 0.90                         | 0.765            | 0.78                      | 0.270        | 0.86                            | 0.191        |
| 5-hydroxyindoleacetate                               | <b>&lt;0.001</b>                  | 2.44                         | <b>&lt;0.001</b> | 2.81                      | <b>0.002</b> | 1.15                            | 0.520        |
| 5-methylthioadenosine                                | 1.000                             | 0.73                         | 0.495            | 0.80                      | 0.357        | 1.09                            | 0.772        |
| 5-oxoproline                                         | <b>&lt;0.001</b>                  | 1.69                         | <b>&lt;0.001</b> | 1.99                      | <b>0.002</b> | 1.18                            | 0.520        |
| Acetylcarnitine (C2:0)                               | <b>0.021</b>                      | 0.73                         | 0.151            | 1.14                      | 0.045        | 1.55                            | <b>0.002</b> |
| acisoga                                              | 1.000                             | 0.85                         | 0.833            | 1.03                      | 0.646        | 1.22                            | 0.536        |
| Aconitic Acid                                        | 1.000                             | 0.50                         | 0.314            | 0.54                      | 0.453        | 1.09                            | 0.879        |

|                                  |                  |      |                  |      |                  |      |              |
|----------------------------------|------------------|------|------------------|------|------------------|------|--------------|
| Allothreonine                    | 0.342            | 1.01 | 0.061            | 1.23 | 0.920            | 1.22 | 0.088        |
| Arabinose                        | 1.000            | 1.08 | 0.486            | 0.85 | 0.783            | 0.79 | 0.736        |
| Arachidonate (20:4)              | <b>0.033</b>     | 1.18 | <b>0.007</b>     | 1.21 | 0.021            | 1.02 | 0.915        |
| Arginine                         | 1.000            | 1.08 | 0.279            | 1.02 | 0.535            | 0.95 | 0.734        |
| Aspargene                        | <b>&lt;0.001</b> | 1.48 | <b>&lt;0.001</b> | 1.78 | <b>0.001</b>     | 1.20 | 0.215        |
| Aspartylleucine                  | <b>0.001</b>     | 2.20 | <b>0.007</b>     | 1.52 | <b>&lt;0.001</b> | 0.69 | 0.172        |
| Beta-alanine                     | <b>&lt;0.001</b> | 0.64 | <b>&lt;0.001</b> | 0.43 | <b>0.004</b>     | 0.68 | 0.426        |
| Butyrylcarnitine (C4:0)          | 0.318            | 1.14 | 0.136            | 1.23 | 0.049            | 1.08 | 0.551        |
| Carnitine                        | <b>0.032</b>     | 0.57 | 0.018            | 0.68 | <b>0.008</b>     | 1.18 | 0.631        |
| Cellobiose                       | 1.000            | 1.41 | 0.397            | 0.73 | 0.691            | 0.52 | 0.268        |
| Cervonyl-carnitine (C22:6)       | 0.624            | 1.35 | 0.650            | 0.84 | 0.163            | 0.62 | 0.086        |
| Citric Acid                      | 0.762            | 0.75 | 0.098            | 1.13 | 0.513            | 1.50 | 0.423        |
| Citrulline                       | <b>&lt;0.001</b> | 1.68 | <b>&lt;0.001</b> | 1.56 | <b>0.001</b>     | 0.93 | 1.000        |
| Creatine                         | <b>0.026</b>     | 0.85 | <b>0.010</b>     | 0.82 | <b>0.010</b>     | 0.97 | 0.826        |
| Cysteine-glycine                 | 1.000            | 0.87 | 0.532            | 1.11 | 0.402            | 1.28 | 0.182        |
| Cysteine-glutathione disulfide   | 0.148            | 0.90 | 0.053            | 1.57 | 0.537            | 1.74 | 0.024        |
| Decanoylcarnitine (C10:0)        | <b>0.017</b>     | 0.68 | 0.026            | 2.14 | 0.218            | 3.17 | <b>0.002</b> |
| Dimethylarginine (ADMA + SDMA)   | <b>&lt;0.001</b> | 1.85 | <b>&lt;0.001</b> | 2.09 | <b>0.002</b>     | 1.13 | 0.696        |
| Docosahexaenoate (DHA; 22:6)     | 0.437            | 1.14 | 0.253            | 0.91 | 0.311            | 0.80 | 0.051        |
| Docosapentaenoate (DPA; 22:5)    | 0.142            | 1.25 | 0.026            | 1.28 | 0.063            | 1.03 | 0.882        |
| Docosapentaenoate (n6 DPA; 22:5) | <b>0.002</b>     | 1.88 | <b>0.004</b>     | 1.54 | <b>0.001</b>     | 0.82 | 0.475        |
| Dodecanoic Acid                  | 1.000            | 0.81 | 0.948            | 0.58 | 0.432            | 0.72 | 0.489        |
| Eicosadieneoyl-carnitine (C20:2) | 0.122            | 1.68 | 0.409            | 1.08 | 0.012            | 0.65 | 0.090        |
| Eicosanoic Acid                  | 1.000            | 1.05 | 0.423            | 0.80 | 0.563            | 0.76 | 0.215        |
| Eicosapentaenoate (EPA; 20:5)    | <b>0.018</b>     | 0.79 | <b>0.001</b>     | 0.52 | 0.226            | 0.65 | 0.110        |
| Eicoseneoyl-carnitine (C20:1)    | 0.169            | 1.59 | 0.506            | 0.82 | 0.064            | 0.51 | 0.019        |
| Fructose                         | <b>0.023</b>     | 0.63 | <b>0.002</b>     | 2.21 | 0.141            | 3.52 | 0.204        |
| Fumaric Acid                     | 0.226            | 1.09 | 0.036            | 1.23 | 0.101            | 1.13 | 0.811        |

|                                           |                  |      |                  |      |                  |      |              |
|-------------------------------------------|------------------|------|------------------|------|------------------|------|--------------|
| Galactose                                 | 0.076            | 0.49 | 0.086            | 0.61 | 0.009            | 1.23 | 0.315        |
| Gamma-glutamylisoleucine                  | <b>0.001</b>     | 2.48 | <b>0.016</b>     | 1.50 | <b>&lt;0.001</b> | 0.60 | 0.098        |
| Gamma-glutamylmethionine                  | <b>0.004</b>     | 2.10 | <b>0.007</b>     | 1.67 | <b>0.001</b>     | 0.80 | 0.368        |
| Gamma-glutamylphenylalanine               | <b>0.001</b>     | 2.29 | <b>0.008</b>     | 1.54 | <b>&lt;0.001</b> | 0.67 | 0.203        |
| Gamma-glutamylvaline                      | <b>0.001</b>     | 2.16 | <b>0.010</b>     | 1.50 | <b>&lt;0.001</b> | 0.69 | 0.159        |
| Glucose                                   | <b>0.038</b>     | 0.56 | 0.069            | 0.68 | <b>0.004</b>     | 1.21 | 0.245        |
| Glutamic Acid                             | <b>&lt;0.001</b> | 1.33 | <b>&lt;0.001</b> | 1.94 | 0.017            | 1.46 | 0.017        |
| Glutaryl carnitine (C5:0-DC)              | <b>0.016</b>     | 0.45 | <b>0.006</b>     | 0.27 | <b>0.008</b>     | 0.60 | 0.890        |
| Glycerol-3-Phosphate                      | <b>0.019</b>     | 0.70 | <b>0.002</b>     | 0.54 | 0.165            | 0.76 | 0.160        |
| Guanidinosuccinate                        | 0.067            | 0.70 | 0.228            | 1.07 | 0.072            | 1.53 | 0.006        |
| Guanosine                                 | <b>&lt;0.001</b> | 0.27 | <b>0.002</b>     | 0.36 | 0.000            | 1.34 | 0.141        |
| Heptadecanoic Acid                        | 1.000            | 1.09 | 0.505            | 1.11 | 0.612            | 1.02 | 0.928        |
| Hexadecadienoyl-carnitine (C16:2)         | 0.263            | 1.47 | 0.763            | 1.02 | 0.033            | 0.69 | 0.077        |
| Hexadecanoic Acid                         | 1.000            | 0.91 | 0.250            | 0.77 | 0.669            | 0.84 | 0.560        |
| Hexadecenoyl-carnitine (C16:1)            | <b>0.016</b>     | 2.06 | 0.778            | 1.03 | <b>0.002</b>     | 0.50 | <b>0.007</b> |
| Hexanoyl carnitine (C6:0)                 | 0.313            | 2.03 | 0.208            | 1.47 | 0.038            | 0.72 | 0.374        |
| Homoarginine                              | <b>0.045</b>     | 1.20 | <b>&lt;0.001</b> | 1.16 | 0.017            | 0.97 | 0.860        |
| Hydroxybutyryl carnitine (C4:0-OH)        | 0.260            | 0.34 | 0.623            | 0.92 | 0.030            | 2.70 | 0.099        |
| Hydroxyisovaleroyl carnitine (C5:0-OH)    | 1.000            | 1.40 | 0.401            | 1.27 | 0.149            | 0.91 | 0.514        |
| Hydroxylauroyl-carnitine (C12:0-OH)       | <b>&lt;0.001</b> | 2.46 | <b>&lt;0.001</b> | 3.17 | <b>0.002</b>     | 1.29 | 0.527        |
| Hydroxylinoleoyl-carnitine (C18:2-OH)     | <b>&lt;0.001</b> | 2.90 | <b>&lt;0.001</b> | 2.52 | <b>&lt;0.001</b> | 0.87 | 0.532        |
| Hydroxymyristate                          | 0.264            | 0.75 | 0.444            | 1.11 | 0.110            | 1.48 | 0.029        |
| Hydroxymyristoyl-carnitine (C14:0-OH)     | <b>&lt;0.001</b> | 2.39 | <b>0.003</b>     | 1.76 | <b>&lt;0.001</b> | 0.74 | 0.117        |
| Hydroxyoctadecenoyl-carnitine (C18:1-OH)) | <b>&lt;0.001</b> | 3.20 | <b>0.002</b>     | 2.08 | <b>&lt;0.001</b> | 0.65 | 0.169        |
| Hydroxypalmitoleoyl-carnitine (C16:1-OH)  | <b>&lt;0.001</b> | 2.20 | <b>&lt;0.001</b> | 1.83 | <b>&lt;0.001</b> | 0.83 | 0.459        |

|                              |                  |      |                  |      |                  |      |                  |
|------------------------------|------------------|------|------------------|------|------------------|------|------------------|
| Hydroxystearate              | <b>0.030</b>     | 1.17 | <b>0.003</b>     | 1.34 | 0.607            | 1.15 | 0.041            |
| Hypoxanthin                  | <b>&lt;0.001</b> | 1.14 | <b>0.001</b>     | 1.10 | <b>&lt;0.001</b> | 0.97 | 0.242            |
| Inosine                      | 1.000            | 0.76 | 0.532            | 1.17 | 0.402            | 1.54 | 0.182            |
| Inositol                     | 0.089            | 0.82 | 0.055            | 0.85 | 0.015            | 1.04 | 0.501            |
| Isobutyrylcarnitine (C4:0)   | 0.311            | 1.15 | 0.140            | 1.22 | 0.046            | 1.07 | 0.529            |
| Isocitric Acid               | 0.613            | 0.71 | 0.077            | 1.19 | 0.610            | 1.68 | 0.299            |
| Isoleucylglycine             | <b>0.032</b>     | 0.92 | <b>0.007</b>     | 2.32 | 0.836            | 2.51 | 0.012            |
| Isovalerylcarnitine (C5:0)   | 0.160            | 2.02 | 0.270            | 1.26 | 0.016            | 0.63 | 0.176            |
| Kynurenine                   | <b>&lt;0.001</b> | 2.46 | <b>&lt;0.001</b> | 2.97 | <b>0.003</b>     | 1.20 | 0.453            |
| L-glutamine                  | <b>0.002</b>     | 0.64 | 0.371            | 1.10 | <b>0.002</b>     | 1.73 | <b>&lt;0.001</b> |
| L-isoleucine                 | <b>0.035</b>     | 1.08 | 0.176            | 0.96 | 0.057            | 0.88 | <b>0.003</b>     |
| L-valine                     | <b>&lt;0.001</b> | 1.48 | <b>&lt;0.001</b> | 1.68 | <b>0.001</b>     | 1.13 | 0.786            |
| Laminaribiose                | 0.977            | 1.30 | 0.219            | 0.65 | 0.764            | 0.50 | 0.179            |
| Laurate (12:0)               | 0.091            | 0.61 | 0.770            | 1.06 | 0.022            | 1.72 | 0.015            |
| Laurylcarnitine (C12:0)      | <b>0.006</b>     | 7.51 | 0.333            | 1.51 | <b>&lt;0.001</b> | 0.20 | <b>0.012</b>     |
| leucine                      | <b>0.039</b>     | 1.08 | 0.181            | 0.96 | 0.059            | 0.88 | <b>0.003</b>     |
| leucylglycine                | <b>0.032</b>     | 0.84 | <b>0.014</b>     | 2.30 | 0.523            | 2.75 | <b>0.006</b>     |
| Linoleate (18:2)             | <b>0.001</b>     | 0.77 | <b>&lt;0.001</b> | 0.60 | 0.063            | 0.78 | 0.080            |
| Linolenate (18:3)            | 0.442            | 0.75 | 0.225            | 0.79 | 0.059            | 1.05 | 0.449            |
| Linolenoyl-carnitine (C18:3) | 0.230            | 1.61 | 0.321            | 1.17 | 0.024            | 0.73 | 0.193            |
| Linoleoylcarnitine (C18:2)   | 0.171            | 1.63 | 0.590            | 0.89 | 0.018            | 0.54 | 0.075            |
| LPC(14:0)                    | <b>0.043</b>     | 0.89 | 0.028            | 1.28 | 0.370            | 1.43 | <b>0.006</b>     |
| LPC(15:0)                    | 0.190            | 0.85 | 0.645            | 1.06 | 0.053            | 1.24 | 0.025            |
| LPC(16:0)                    | <b>0.005</b>     | 0.91 | 0.211            | 0.96 | <b>&lt;0.001</b> | 1.05 | 0.020            |
| LPC(16:1)                    | 0.157            | 1.19 | 0.025            | 1.18 | 0.080            | 0.99 | 0.798            |
| LPC(17:0)                    | <b>0.002</b>     | 0.83 | <b>&lt;0.001</b> | 0.71 | 0.090            | 0.85 | 0.085            |
| LPC(18:0)                    | 0.409            | 0.93 | 0.229            | 1.06 | 0.322            | 1.13 | 0.048            |
| LPC(18:1)                    | <b>0.015</b>     | 1.30 | 0.615            | 0.94 | <b>0.006</b>     | 0.73 | <b>0.002</b>     |

|                               |                  |      |                  |      |                  |      |                  |
|-------------------------------|------------------|------|------------------|------|------------------|------|------------------|
| LPC(18:3n3)                   | 1.000            | 0.90 | 0.566            | 1.01 | 0.442            | 1.12 | 0.811            |
| LPC(19:0)                     | <b>0.044</b>     | 0.79 | 0.160            | 1.21 | 0.076            | 1.54 | <b>0.004</b>     |
| LPC(20:0)                     | 0.183            | 0.64 | 0.250            | 0.71 | 0.019            | 1.10 | 0.211            |
| LPC(20:1n9)                   | <b>0.007</b>     | 1.27 | 0.009            | 1.24 | <b>0.002</b>     | 0.98 | 0.451            |
| LPC(20:2)                     | <b>&lt;0.001</b> | 2.10 | <b>&lt;0.001</b> | 2.03 | <b>&lt;0.001</b> | 0.97 | 0.917            |
| LPC(20:3)                     | <b>&lt;0.001</b> | 1.42 | <b>&lt;0.001</b> | 2.10 | 0.031            | 1.47 | 0.040            |
| LPC(20:4)                     | <b>&lt;0.001</b> | 1.26 | <b>&lt;0.001</b> | 2.51 | 0.237            | 2.00 | <b>0.003</b>     |
| LPC(20:5n3)                   | 1.000            | 0.80 | 0.684            | 0.90 | 0.304            | 1.13 | 0.529            |
| LPC(22:5n6)                   | <b>0.001</b>     | 1.57 | <b>&lt;0.001</b> | 1.76 | 0.020            | 1.12 | 0.258            |
| LPC(22:6)                     | 0.674            | 1.11 | 0.086            | 1.00 | 0.385            | 0.91 | 0.516            |
| LPE(16:0)                     | <b>0.006</b>     | 0.98 | <b>0.001</b>     | 0.83 | 0.968            | 0.84 | <b>0.005</b>     |
| LPE(18:0)                     | 0.343            | 1.27 | 0.802            | 1.01 | 0.046            | 0.80 | 0.092            |
| LPE(18:2)                     | 0.360            | 0.81 | 0.143            | 0.84 | 0.056            | 1.04 | 0.578            |
| LPE(20:3)                     | <b>0.004</b>     | 1.04 | <b>&lt;0.001</b> | 1.82 | 0.602            | 1.76 | <b>0.011</b>     |
| LPE(20:4)                     | <b>0.001</b>     | 0.90 | <b>0.001</b>     | 1.95 | 0.575            | 2.17 | <b>&lt;0.001</b> |
| LPE(20:5n3)                   | 1.000            | 0.66 | 0.632            | 0.74 | 0.202            | 1.13 | 0.423            |
| LPE(O-16:0)                   | <b>0.006</b>     | 1.03 | <b>0.001</b>     | 0.76 | 0.945            | 0.74 | <b>0.006</b>     |
| LPE(O-18:0)                   | <b>0.001</b>     | 1.00 | <b>&lt;0.001</b> | 0.50 | 0.705            | 0.50 | <b>0.001</b>     |
| Lysine                        | 0.903            | 0.97 | 0.164            | 1.00 | 0.941            | 1.03 | 0.205            |
| Lyxose                        | 1.000            | 1.16 | 0.200            | 1.04 | 0.651            | 0.89 | 0.501            |
| Malic Acid                    | 0.652            | 1.04 | 0.081            | 1.20 | 0.525            | 1.15 | 0.370            |
| Maltose                       | 1.000            | 1.41 | 0.339            | 0.73 | 0.806            | 0.52 | 0.290            |
| Mead Acid (20:3)              | <b>0.002</b>     | 1.34 | 0.001            | 1.22 | <b>0.003</b>     | 0.91 | 0.985            |
| Methionine                    | 1.000            | 1.03 | 0.916            | 0.98 | 0.818            | 0.95 | 0.757            |
| Methylmalonyl carnitine       | <b>0.007</b>     | 0.43 | 0.027            | 0.56 | <b>0.001</b>     | 1.28 | 0.211            |
| Myristic Acid                 | 1.000            | 0.84 | 0.297            | 0.80 | 0.368            | 0.95 | 0.969            |
| Myristoleoylcarnitine (C14:1) | <b>0.028</b>     | 2.36 | 0.726            | 1.07 | <b>0.003</b>     | 0.45 | <b>0.013</b>     |
| Myristoylcarnitine (C14:0)    | <b>0.034</b>     | 2.04 | 0.452            | 1.11 | <b>0.003</b>     | 0.54 | 0.030            |

|                            |              |      |                  |      |                  |      |              |
|----------------------------|--------------|------|------------------|------|------------------|------|--------------|
| N-Acetyl-Glucosamine       | 0.132        | 0.83 | 0.083            | 0.86 | 0.019            | 1.04 | 0.461        |
| N- Acetyl -L-Aapartic Acid | <b>0.007</b> | 1.34 | <b>0.001</b>     | 1.68 | 0.081            | 1.26 | 0.189        |
| N6-succinyladenosine       | 0.944        | 0.81 | 0.403            | 0.78 | 0.134            | 0.96 | 0.480        |
| Nicotinamide               | <b>0.001</b> | 1.64 | <b>&lt;0.001</b> | 1.84 | <b>0.007</b>     | 1.12 | 0.449        |
| Nonanoic Acid              | 1.000        | 1.00 | 0.949            | 0.36 | 0.254            | 0.36 | 0.254        |
| Octadecadienoic Acid       | <b>0.009</b> | 1.09 | 0.017            | 0.83 | 0.200            | 0.76 | <b>0.001</b> |
| Octadecanedioate (C18)     | 0.133        | 0.67 | 0.777            | 0.86 | 0.017            | 1.28 | 0.042        |
| Octadecenoic Acid          | 1.000        | 1.10 | 0.375            | 0.45 | 0.586            | 0.41 | 0.200        |
| Octanoyl-carnitine (C8:0)  | 0.097        | 2.26 | 0.019            | 2.39 | 0.047            | 1.06 | 0.895        |
| Octenoyl-carnitine (C8:1)  | <b>0.011</b> | 0.54 | 0.212            | 0.83 | <b>0.001</b>     | 1.53 | 0.035        |
| Oleate (18:1)              | <b>0.017</b> | 0.82 | <b>0.002</b>     | 0.73 | 0.055            | 0.89 | 0.383        |
| Oleoylecarnitine (C18:1)   | 0.069        | 1.66 | 0.938            | 0.95 | 0.011            | 0.57 | 0.018        |
| Ophthalmic Acid            | <b>0.004</b> | 0.53 | <b>0.005</b>     | 0.60 | <b>0.001</b>     | 1.14 | 0.503        |
| Ornithine                  | <b>0.019</b> | 1.47 | <b>0.003</b>     | 1.63 | 0.033            | 1.10 | 0.583        |
| Palmitate (16:0)           | 1.000        | 0.87 | 0.529            | 0.95 | 0.142            | 1.09 | 0.391        |
| Palmitoleate (16:1)        | 0.781        | 0.72 | 0.818            | 1.18 | 0.161            | 1.63 | 0.125        |
| Palmitoylcarnitine (C16:0) | 0.051        | 1.31 | 0.101            | 0.80 | 0.135            | 0.61 | 0.005        |
| LPC(14:0)                  | 0.075        | 0.88 | 0.059            | 1.19 | 0.297            | 1.36 | 0.009        |
| Pentadecanoic Acid         | 1.000        | 0.76 | 0.872            | 0.92 | 0.181            | 1.21 | 0.256        |
| Phenylacetylglutamine      | 1.000        | 1.11 | 0.490            | 1.38 | 0.626            | 1.25 | 0.290        |
| Phenylalanine              | 0.308        | 1.17 | 0.091            | 1.14 | 0.063            | 0.97 | 0.751        |
| Phenylalanylglutamate      | <b>0.001</b> | 2.28 | <b>0.008</b>     | 1.53 | <b>&lt;0.001</b> | 0.67 | 0.167        |
| Phenylalanylleucine        | 0.933        | 0.76 | 0.181            | 0.80 | 0.881            | 1.05 | 0.196        |
| Phenylalanylphenylalanine  | 0.697        | 0.83 | 0.139            | 1.14 | 0.839            | 1.38 | 0.143        |
| Picolinic Acid             | 1.000        | 1.00 | 0.711            | 1.18 | 0.858            | 1.18 | 0.625        |
| Proline                    | 0.763        | 1.00 | 0.131            | 1.14 | 0.978            | 1.14 | 0.185        |
| Propionylcarnitine (C3:0)  | 0.102        | 1.43 | 0.988            | 0.90 | 0.017            | 0.63 | 0.023        |
| Pyroglutamic Acid          | <b>0.003</b> | 1.07 | <b>&lt;0.001</b> | 1.36 | 0.169            | 1.27 | 0.055        |

|                                   |                  |      |                  |      |                  |      |                  |
|-----------------------------------|------------------|------|------------------|------|------------------|------|------------------|
| Quinolinic Acid                   | 0.059            | 2.84 | 0.007            | 5.00 | 0.069            | 1.76 | 0.566            |
| Ribose                            | <b>0.005</b>     | 1.43 | <b>0.001</b>     | 1.53 | <b>0.013</b>     | 1.07 | 0.581            |
| S-adenosylhomocysteine (SAH)      | <b>0.003</b>     | 0.78 | <b>0.007</b>     | 1.50 | 0.175            | 1.91 | <b>&lt;0.001</b> |
| Sakebiose                         | 1.000            | 1.41 | 0.413            | 0.73 | 0.683            | 0.52 | 0.274            |
| Sorbose                           | <b>0.005</b>     | 0.52 | <b>&lt;0.001</b> | 2.46 | 0.137            | 4.77 | 0.100            |
| Squalene                          | 1.000            | 0.76 | 0.439            | 1.02 | 0.689            | 1.35 | 0.295            |
| Stearoylcarnitine (C18)           | 0.574            | 1.17 | 0.240            | 0.75 | 0.418            | 0.64 | 0.075            |
| Suberate (octanedioate)           | 0.393            | 0.71 | 0.856            | 0.97 | 0.076            | 1.37 | 0.065            |
| Succinic Acid                     | 0.196            | 0.89 | 0.019            | 0.71 | 0.342            | 0.80 | 0.269            |
| Sucrose                           | 1.000            | 0.57 | 0.248            | 1.25 | 0.762            | 2.19 | 0.200            |
| Tetradecadienyl-carnitine (C14:2) | 0.437            | 1.74 | 0.819            | 1.14 | 0.060            | 0.66 | 0.111            |
| Threonine                         | 0.324            | 1.02 | 0.048            | 1.24 | 0.918            | 1.22 | 0.109            |
| Tiglyl carnitine (C5:1)           | 0.079            | 1.84 | 0.235            | 1.21 | 0.007            | 0.66 | 0.123            |
| Tryptophan                        | <b>0.002</b>     | 0.67 | <b>0.001</b>     | 0.68 | <b>0.003</b>     | 1.01 | 0.975            |
| Tryptophan betaine                | 0.767            | 0.74 | 0.478            | 1.66 | 0.276            | 2.23 | 0.099            |
| Tyrosine                          | 0.220            | 1.25 | 0.027            | 1.33 | 0.164            | 1.06 | 0.560            |
| Uracil                            | <b>&lt;0.001</b> | 0.48 | <b>0.002</b>     | 0.55 | <b>&lt;0.001</b> | 1.14 | 0.285            |
| Valerylcarnitine (C5:0)           | 0.311            | 2.32 | 0.538            | 1.47 | 0.034            | 0.63 | 0.138            |
| valylalanine                      | <b>0.022</b>     | 0.84 | <b>0.009</b>     | 2.32 | 0.578            | 2.75 | <b>0.005</b>     |
| Xylose                            | 1.000            | 1.13 | 0.163            | 0.95 | 0.582            | 0.84 | 0.500            |

\* Kruskal Wallis p values adjusted by Benjamini-Hocheberg method

\*\* Dunn post hoc test p values
