# Supplementary material for: Mucosal Metabolomic Profiling and Pathway Analysis Reveal the Metabolic Signature of Ulcerative Colitis
Source: Metabolites. 2019 Nov 27;9(12):291. doi: 10.3390/metabo9120291 (PMC6950742; doi:10.3390/metabo9120291)
Supplement: Supplementary file 1 [file metabolites-09-00291-s001.zip]

Archive with 7 entries (6 files):
- supplementary materials/
- supplementary materials/Sup Figure 1.pdf
- supplementary materials/Sup Figure 2.pdf
- supplementary materials/Sup Table 1.pdf
- supplementary materials/Sup table 2.xlsx
- supplementary materials/Sup table 3.xlsx
- supplementary materials/Supp data.pdf
