# Supplementary material for: Mucosal Metabolomic Profiling and Pathway Analysis Reveal the Metabolic Signature of Ulcerative Colitis
Source: Metabolites. 2019 Nov 27;9(12):291. doi: 10.3390/metabo9120291 (PMC6950742; doi:10.3390/metabo9120291)
Supplement: Supplementary file 1 [file metabolites-09-00291-s001.zip › supplementary materials/Sup table 2.xlsx]

## Sheet: Sheet1
Var ID (Primary)	M3.VIP[2+1+0]	2.44693 * M3.VIP[2]cvSE
GLUTAMIC ACID	1.6688	0.400375
ASPARAGINE	1.61278	0.293011
LPE(O-18:0)	1.60607	0.379085
HYPOXANTHINE	1.57763	0.283781
LPC(20:3)	1.57138	0.416964
Hydroxylinoleoyl-carnitine (C18:2-OH)	1.56999	0.648831
LPC(20:4)	1.54688	0.345437
LPE(20:4)	1.46585	0.362886
Hydroxylauroyl-carnitine (C12:0-OH)	1.44874	0.52408
5-hydroxyindoleacetate	1.441	0.466468
kynurenine	1.43339	0.459598
gamma-glutamylisoleucine*	1.42396	0.408626
LPE(20:3)	1.41559	0.588051
Hydroxyoctadecenoyl-carnitine (C18:1-OH))	1.39621	0.816857
GLUTAMINE	1.38843	0.398722
Ophthalmic acid	1.38621	0.288667
aspartylleucine	1.37075	0.386772
Hydroxymyristoyl-carnitine (C14:0-OH)	1.36921	0.505991
S-adenosylhomocysteine (SAH)	1.36597	0.570698
Hydroxypalmitoleoyl-carnitine (C16:1-OH)	1.36589	0.595132
PC(0:0/18:1)	1.36555	0.362956
dimethylarginine (ADMA + SDMA)	1.36535	0.374834
gamma-glutamylphenylalanine	1.34646	0.405162
LPC(18:1)	1.33839	0.446567
phenylalanylglutamate	1.3379	0.407612
Hexadecenoyl-carnitine (C16:1)	1.33258	0.78603
Acetylcarnitine (C2:0)	1.33012	0.592637
uracil	1.32945	0.431819
5-oxoproline	1.3283	0.695243
Laurylcarnitine (C12:0)	1.32551	0.56911
gamma-glutamylvaline	1.32165	0.462682
Oleoylcarnitine (C18:1)	1.31652	0.961096
LPC(20:2)	1.30687	0.531047
L-glutamine	1.30635	0.577897
hypoxanthin	1.30374	0.522803
PYROGLUTAMIC ACID	1.29948	0.62106
Laurate (12:0)	1.28798	0.655972
Linoleate (18:2)	1.2847	0.573338
valylalanine	1.28415	0.454607
leucylglycine	1.27189	0.453086
Myristoleoylcarnitine (C14:1)	1.27037	0.635058
Octenoyl-carnitine (C8:1)	1.26894	0.418495
Myristoylcarnitine (C14:0)	1.26059	0.720693
gamma-glutamylmethionine	1.25588	0.402211
NICOTINAMIDE	1.24757	0.575921
Palmitoylcarnitine (C16:0)	1.24006	0.957939
Methylmalonyl carnitine	1.23522	0.565435
isoleucylglycine	1.22365	0.467843
tryptophan	1.22041	0.578717
LPC(17:0)	1.21047	0.376118
3-methylglutarylcarnitine (2)	1.18527	0.429987
glutamate	1.18398	0.491909
EICOSAPENTAENOIC ACID	1.17286	0.423523
guanosine	1.17008	0.615583
3-methylglutarylcarnitine	1.16223	0.464962
LPC(22:5)	1.14992	0.445373
OCTADECADIENOIC ACID	1.14738	0.863782
LPC(19:0)	1.14245	0.702884
Eicoseneoyl-carnitine (C20:1)	1.13971	0.75045
LPE(O-16:0)	1.13525	0.819815
Myristate (14:0)	1.11531	0.643273
PC(14:0/0:0)	1.11173	0.734123
Docosapentaenoate (n6 DPA; 22:5_b)	1.10489	0.733868
PE(0:0/16:0)	1.09182	0.453914
GLUCOSE	1.09088	0.524272
Eicosapentaenoate (EPA; 20:5)	1.08822	0.763076
Docosahexaenoate (DHA; 22:6)	1.07838	0.526954
L-tyrosine	1.07746	1.12042
beta-alanine	1.07719	1.06398
Oleate (18:1)	1.07635	0.883612
LPE(16:0)	1.07443	0.476244
N-ACETYL-L-ASPARTIC ACID	1.06972	0.532695
Quinolinic acid	1.06857	0.774436
leucine	1.06368	0.637023
LPC(16:0)	1.06241	0.419744
LPC(20:1n9)	1.06226	0.215063
L-isoleucine	1.05828	0.639077
PC(16:0/0:0)	1.05592	0.377167
GALACTOSE	1.04922	0.573231
RIBOSE	1.04425	0.43361
3-Hydroxylaurate	1.037	0.657397
cysteine-glutathione disulfide	1.03649	0.629483
PC(20:1n9/0:0)	1.0337	0.296557
Linoleoylcarnitine (C18:2)	1.03224	0.843935
Decanoylcarnitine (C10:0)	1.02895	0.817136
LPC(14:0)	1.02371	0.981505
3-Hydroxymyristate	1.02189	0.2863
ORNITHINE	1.01495	1.02728
3-Carboxy-4-methyl-5-propyl-2-furanpropanoate (CMPF)	1.01046	0.668164
Carnitine	1.00614	0.817907
LPE(18:0)	1.00273	0.517973
Hydroxybutyrylcarnitine (C4:0-OH)	0.996815	1.43655
Hydroxymyristate	0.98071	0.392709
TYROSINE	0.979487	0.563697
THREONINE	0.97593	0.520801
Octanoyl-carnitine (C8:0)	0.973775	1.11753
LPC(16:1)	0.967078	0.418544
ALLOTHREONINE	0.963304	0.521841
GLYCEROL-3-PHOSPHATE	0.95962	0.776171
Eicosadieneoyl-carnitine (C20:2)	0.957714	0.807886
Hexadecadienoyl-carnitine (C16:2)	0.956969	1.06219
creatine	0.95409	0.854318
2-Hydroxyoctanoate	0.942582	0.882888
Linoleneoyl-carnitine (C18:3)	0.940305	0.716004
Mead acid (20:3)_b	0.937825	1.06312
VALINE	0.93384	0.577361
Tetradecadienyl-carnitine (C14:2)	0.930965	0.678459
LPC(15:0)	0.914714	0.644089
Stearoylcarnitine (C18)	0.914279	0.624155
citrulline	0.912531	0.522059
3-Hydroxypalmitate	0.91044	0.471231
Docosapentaenoate (DPA; 22:5)	0.905011	0.343322
Arachidonate (20:4)	0.90293	0.620925
Palmitoleate (16:1)	0.888376	0.879588
Suberate (octanedioate)	0.881134	0.679818
2-Hydroxypalmitate	0.869224	0.475281
Hexanoylcarnitine (C6:0)	0.86738	0.849653
2'-O-methylguanosine	0.859313	0.6719
Cervonyl-carnitine (C22:6)	0.853234	0.545477
Octadecanedioate (C18)	0.842809	0.439163
LPC(18:0)	0.841777	0.38971
Propionylcarnitine (C3:0)	0.825055	0.677115
ISOLEUCINE	0.822041	0.673244
SUCROSE	0.811048	1.47847
Hydroxystearate	0.798924	0.329871
INOSITOL	0.790601	0.858483
Mead acid (20:3)	0.788904	0.560789
ACONITIC ACID	0.784128	0.886435
LPE(20:5n3)	0.782949	0.513188
L-valine	0.782914	0.468626
Octadecenoic acid	0.782307	1.02785
LPC(20:0)	0.780309	0.520731
N-ACETYL GLUCOSAMINE	0.772864	0.892129
4-AMINOBUTYRIC ACID	0.766514	0.624779
MALIC ACID	0.765472	0.413365
Isovalerylcarnitine (C5:0)	0.762498	0.681921
PHENYLALANINE	0.75612	0.77651
tryptophan betaine	0.747904	1.06984
Glutarylcarnitine (C5:0-DC)	0.747801	0.827792
Linolenate (18:3)	0.744201	0.746413
Palmitate (16:0)	0.732509	0.463036
cys-gly, oxidized	0.729628	0.505379
SORBOSE	0.725282	1.19912
HEXADECANOIC ACID	0.725086	1.38023
Tiglyl carnitine (C5:1)	0.720644	0.546183
SUCCINIC ACID	0.71508	0.691938
2-Hydroxystearate	0.702326	0.298113
FRUCTOSE	0.697212	1.01404
guanidinosuccinate	0.686565	0.522287
proline	0.67127	0.63465
EICOSANOIC ACI	0.669766	1.20183
CITRIC ACID	0.647259	0.861112
homoarginine	0.639448	0.722946
LPE(18:2)	0.637656	0.951769
Hydroxyisovaleroylcarnitine (C5:0-OH)	0.630393	0.608659
3-Hydroxydecanoate	0.626402	0.887043
LAMINARIBIOSE	0.61719	0.570024
Valerylcarnitine (C5:0)	0.614512	0.799217
INOSINE	0.614291	1.10242
LPC(20:5n3)	0.61321	0.561226
CREATININE	0.597589	0.901912
SAKEBIOSE	0.59525	0.473625
CELLOBIOSE	0.59416	0.468641
MALTOSE	0.591234	0.461861
ISOCITRIC ACID	0.577321	0.957969
methionine	0.569501	0.528048
L-lysine	0.567795	0.43543
acisoga	0.562329	0.637863
NONANOIC ACID	0.543778	1.26142
MYRISTIC ACID	0.528231	0.942721
5-methylthioadenosine	0.528011	0.715864
LPC(18:3n3)	0.490566	1.04668
PENTADECANOIC ACID	0.489735	0.563921
OCTADECENOIC ACID TMS	0.483116	0.864266
FUMARIC ACID	0.479367	0.626493
L-Phenylalanine	0.472344	1.19143
HEPTADECANOIC ACID	0.464467	1.09121
DODECANOIC	0.46128	0.840736
phenylacetylglutamine	0.415459	0.917969
arginine	0.36025	0.376427
LPC(22:6)	0.357341	0.578989
creatinin	0.333041	0.875119
Picolinic acid	0.331746	0.60251
Isobutyrylcarnitine (C4:0)	0.32872	0.993182
Butyrylcarnitine (C4:0)	0.32483	0.998584
SQUALENE	0.32233	0.807368
XYLOSE-MEOX	0.318559	0.2206
phenylalanylleucine	0.311577	1.16106
2-Hydroxyhexanoate	0.309728	0.595645
5-hydroxyhexanoate	0.307446	0.655191
phenylalanylphenylalanine	0.306716	0.584549
LYXOSE	0.30565	0.600441
N6-succinyladenosine	0.284565	0.642796
ARABINOSE	0.249312	0.470062
LYSINE	0.200173	0.66863
