# Supplementary material for: Mucosal Metabolomic Profiling and Pathway Analysis Reveal the Metabolic Signature of Ulcerative Colitis
Source: Metabolites. 2019 Nov 27;9(12):291. doi: 10.3390/metabo9120291 (PMC6950742; doi:10.3390/metabo9120291)
Supplement: Supplementary file 1 [file metabolites-09-00291-s001.zip › supplementary materials/Sup table 3.xlsx]

## Sheet: Sheet1
KEEG Pathway	Total Cmpd	Hits	Raw p	-log(p)	Holm adjust	FDR	Impact
Linoleic acid metabolism	15	1	2.3424e-06	12.964	0.00011712	0.00011712	0.65625
Glutathione metabolism	38	4	7.6349e-06	11.783	0.00037411	0.00018792	0.01285
Tryptophan metabolism	79	3	1.1275e-05	11.393	0.00054121	0.00018792	0.15492
Histidine metabolism	44	1	4.9816e-05	9.9072	0.0023413	0.0006227	0.00051
Butanoate metabolism	40	4	0.00012958	8.9512	0.0059607	0.0012958	0.04612
Nitrogen metabolism	39	6	0.00021697	8.4358	0.0097635	0.0018081	0.00763
Cyanoamino acid metabolism	16	1	0.00025668	8.2677	0.011294	0.0018335	0
Alanine, aspartate and glutamate metabolism	24	7	0.00032925	8.0187	0.014158	0.0020578	0.53466
Porphyrin and chlorophyll metabolism	104	2	0.001047	6.8619	0.043973	0.0058165	0
Purine metabolism	92	4	0.0013415	6.6139	0.055003	0.0067077	0.02045
Glycerolipid metabolism	32	1	0.0016338	6.4169	0.065352	0.0074263	0.00714
Nicotinate and nicotinamide metabolism	44	3	0.00234	6.0576	0.091261	0.0097501	0.06275
Arginine and proline metabolism	77	10	0.0037076	5.5974	0.14089	0.01426	0.47111
Propanoate metabolism	35	3	0.0046454	5.3719	0.17188	0.016591	0.08634
Glycerophospholipid metabolism	39	2	0.0051199	5.2746	0.18432	0.017066	0.03572
Glycine, serine and threonine metabolism	48	4	0.0056533	5.1755	0.19787	0.017667	0.09732
Fructose and mannose metabolism	48	1	0.0061829	5.086	0.21022	0.018064	0.00056
alpha-Linolenic acid metabolism	29	1	0.006503	5.0355	0.2146	0.018064	0.20335
D-Glutamine and D-glutamate metabolism	11	3	0.007762	4.8585	0.24839	0.020426	0.46524
Pantothenate and CoA biosynthesis	27	3	0.011747	4.4442	0.36416	0.029367	0.07286
Fatty acid biosynthesis	49	5	0.013773	4.285	0.41319	0.031837	0
Starch and sucrose metabolism	50	5	0.014564	4.2292	0.42236	0.031837	0.11872
Pentose phosphate pathway	32	2	0.014645	4.2236	0.42236	0.031837	0
Amino sugar and nucleotide sugar metabolism	88	5	0.015703	4.1539	0.42398	0.032714	0.01129
Aminoacyl-tRNA biosynthesis	75	14	0.017143	4.0662	0.44572	0.034286	0.11268
Valine, leucine and isoleucine biosynthesis	27	4	0.025097	3.685	0.62741	0.046705	0.03975
Galactose metabolism	41	3	0.025221	3.6801	0.62741	0.046705	0.01992
D-Arginine and D-ornithine metabolism	8	2	0.028191	3.5688	0.64838	0.05034	0
Cysteine and methionine metabolism	56	3	0.034263	3.3737	0.75378	0.059073	0.18644
Glycolysis or Gluconeogenesis	31	1	0.042284	3.1633	0.88797	0.070474	0
Valine, leucine and isoleucine degradation	40	3	0.04568	3.0861	0.91361	0.073678	0.02232
Inositol phosphate metabolism	39	1	0.054634	2.9071	1	0.085365	0.13703
Phenylalanine, tyrosine and tryptophan biosynthesis	27	3	0.077578	2.5565	1	0.11754	0.008
Fatty acid elongation in mitochondria	27	1	0.090472	2.4027	1	0.13305	0
beta-Alanine metabolism	28	3	0.096085	2.3425	1	0.13726	0.25694
Tyrosine metabolism	76	3	0.10984	2.2088	1	0.15255	0.04724
Ascorbate and aldarate metabolism	45	2	0.12845	2.0522	1	0.17358	0
Citrate cycle (TCA cycle)	20	5	0.14703	1.9171	1	0.19346	0.20794
Phenylalanine metabolism	45	5	0.17054	1.7688	1	0.21864	0.11906
Fatty acid metabolism	50	2	0.18809	1.6708	1	0.23092	0.02959
Pyrimidine metabolism	60	3	0.1907	1.657	1	0.23092	0.07132
Glyoxylate and dicarboxylate metabolism	50	4	0.19397	1.64	1	0.23092	0.03137
Arachidonic acid metabolism	62	1	0.42085	0.86548	1	0.48936	0.21669
Lysine degradation	47	1	0.60519	0.50222	1	0.65781	0.14675
Lysine biosynthesis	32	1	0.60519	0.50222	1	0.65781	0.09993
Biotin metabolism	11	1	0.60519	0.50222	1	0.65781	0
Pentose and glucuronate interconversions	53	2	0.70756	0.34594	1	0.75272	0.02401
Ubiquinone and other terpenoid-quinone biosynthesis	36	1	0.97044	0.030005	1	0.97506	0
Thiamine metabolism	24	1	0.97044	0.030005	1	0.97506	0
Vitamin B6 metabolism	32	1	0.97506	0.025257	1	0.97506	0.00798
