# Supplementary figures and images for: Mucosal Metabolomic Profiling and Pathway Analysis Reveal the Metabolic Signature of Ulcerative Colitis
Source: MDPI journal article supplement (doi:10.3390/metabo9120291), 2019-11-27

R2Y(Cum), Q2(Cum)

● R2Y(Cum)  
■ Q2(Cum)

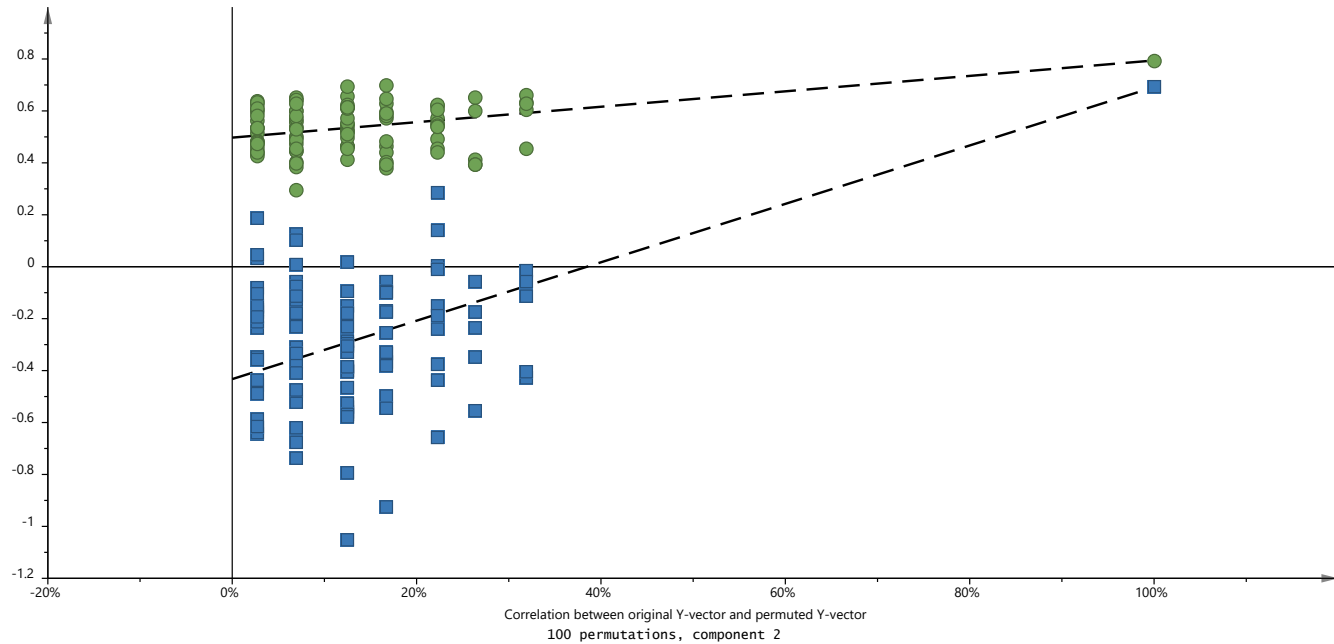

Supplement: s1 [file s1]

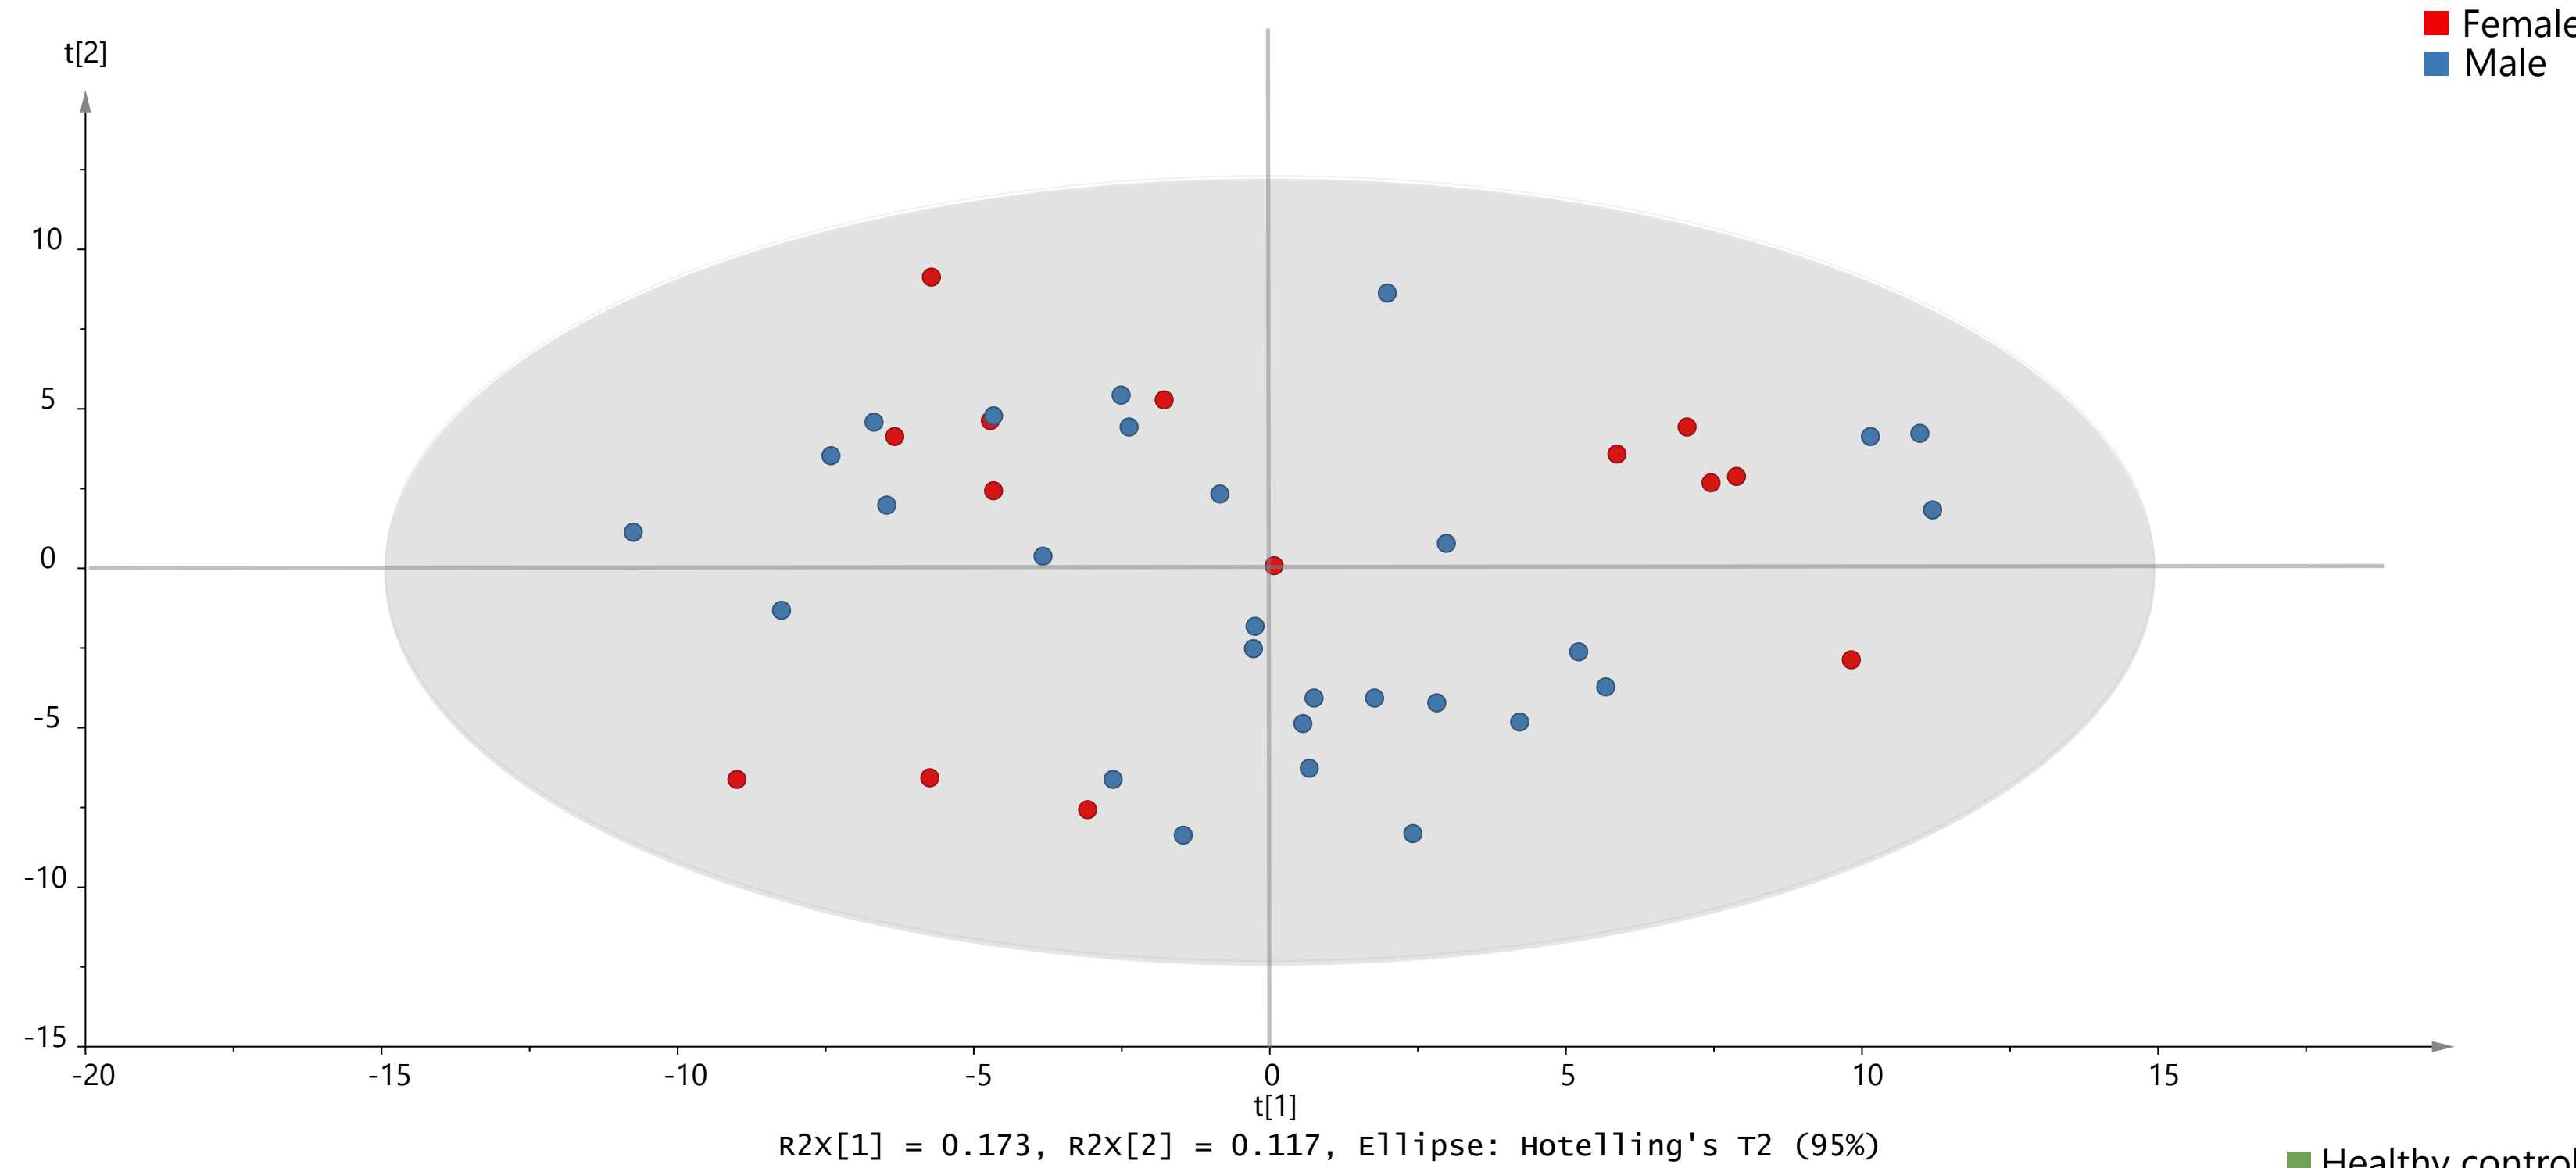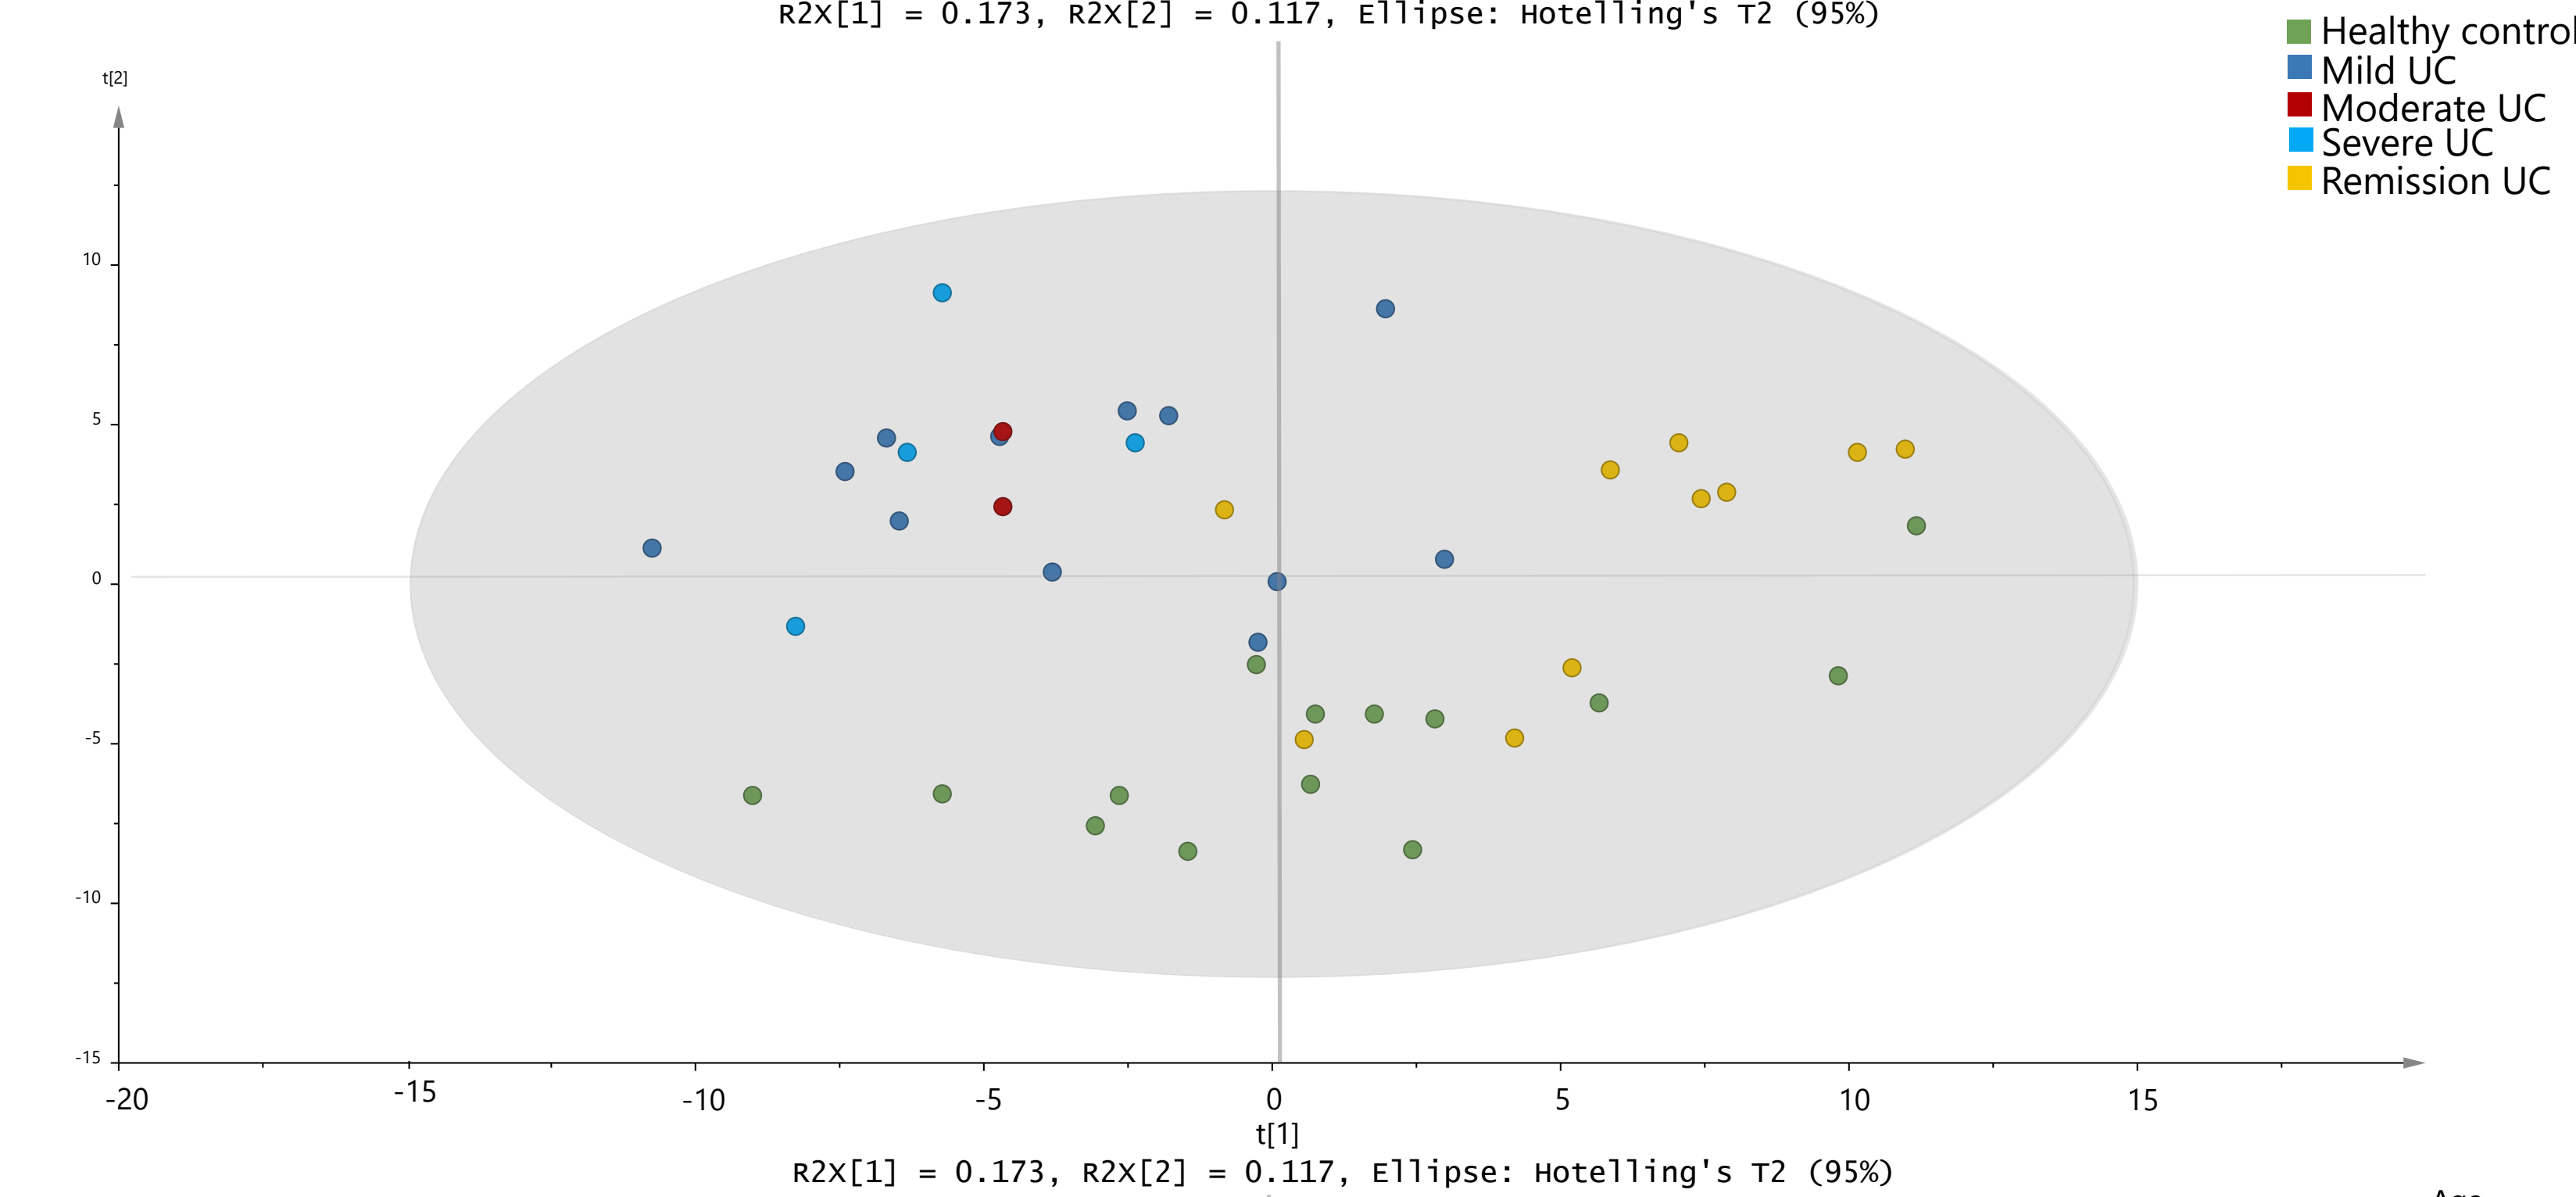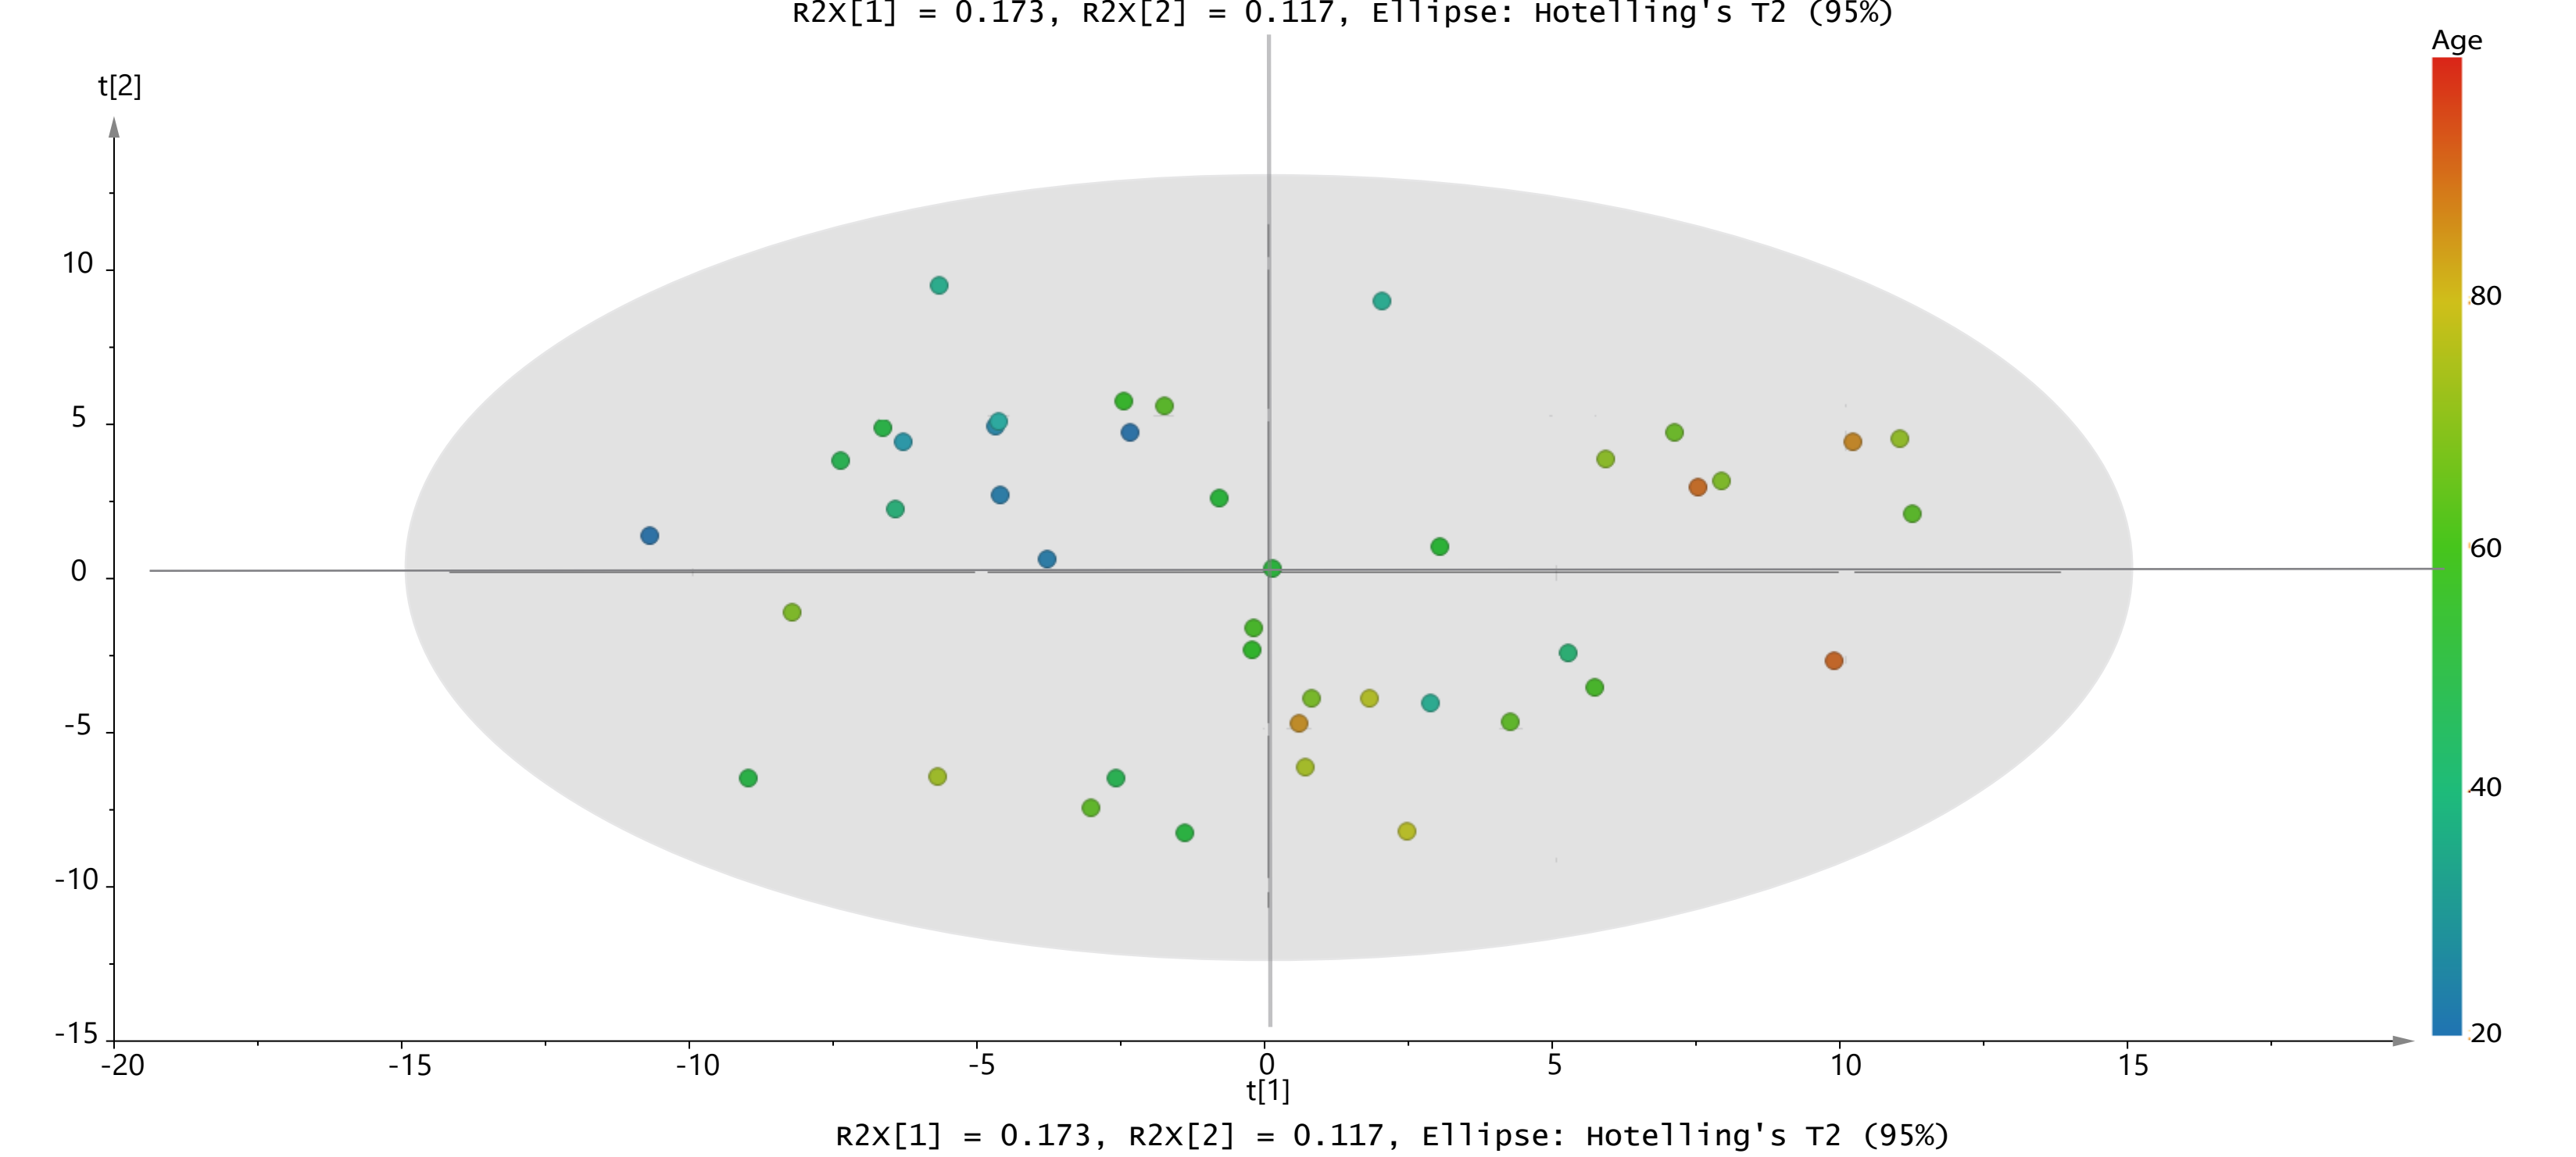

Supplement: s1 [file s1]
